# Supplementary material for: TACI Expression and Signaling in Chronic Lymphocytic Leukemia
Source: PubMed Central journal article supplement (PMC4408744; doi:10.1155/2015/478753), 2015-04-09

A.

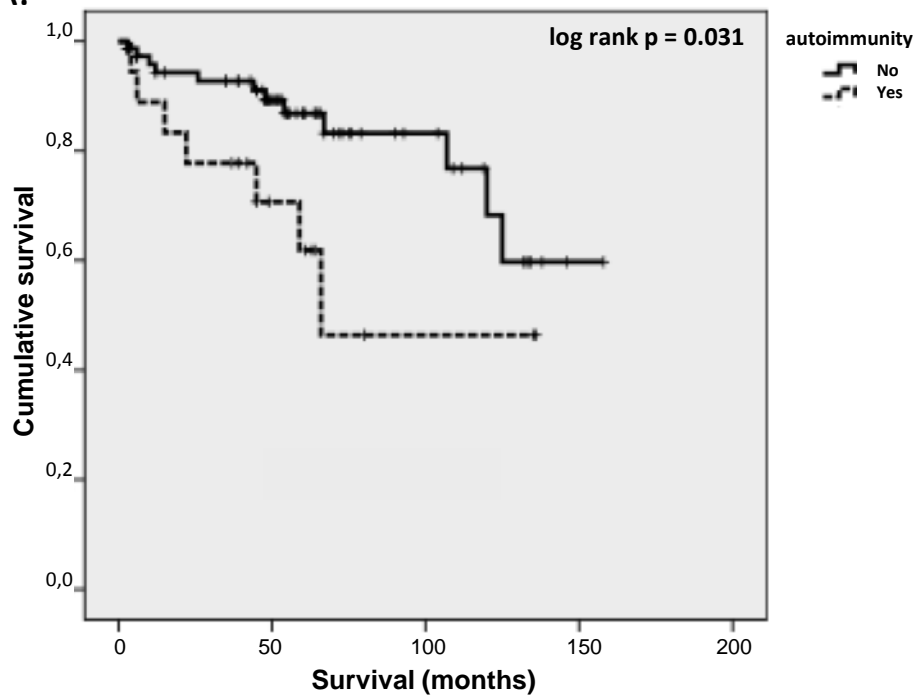

B.

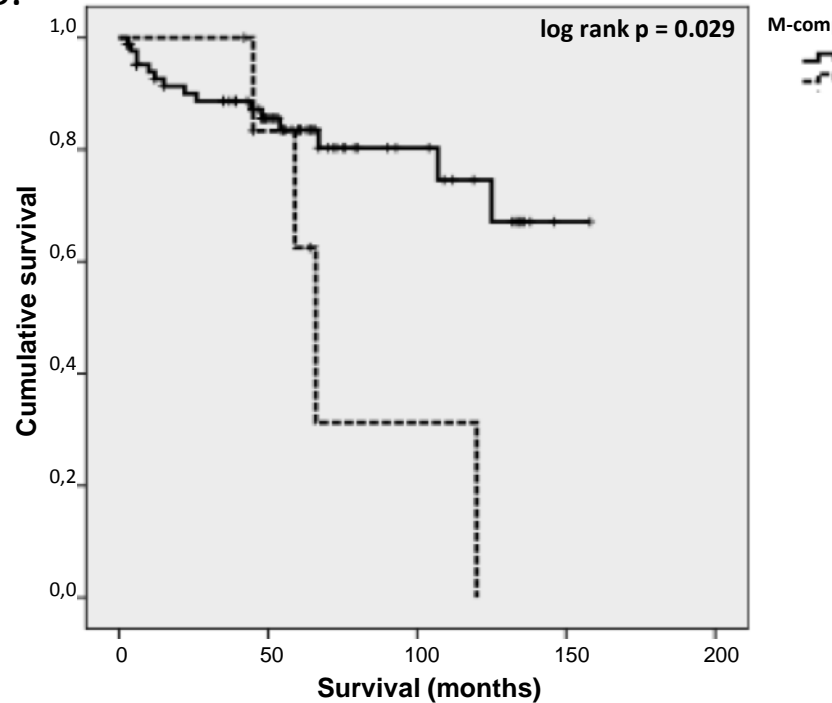

**A.**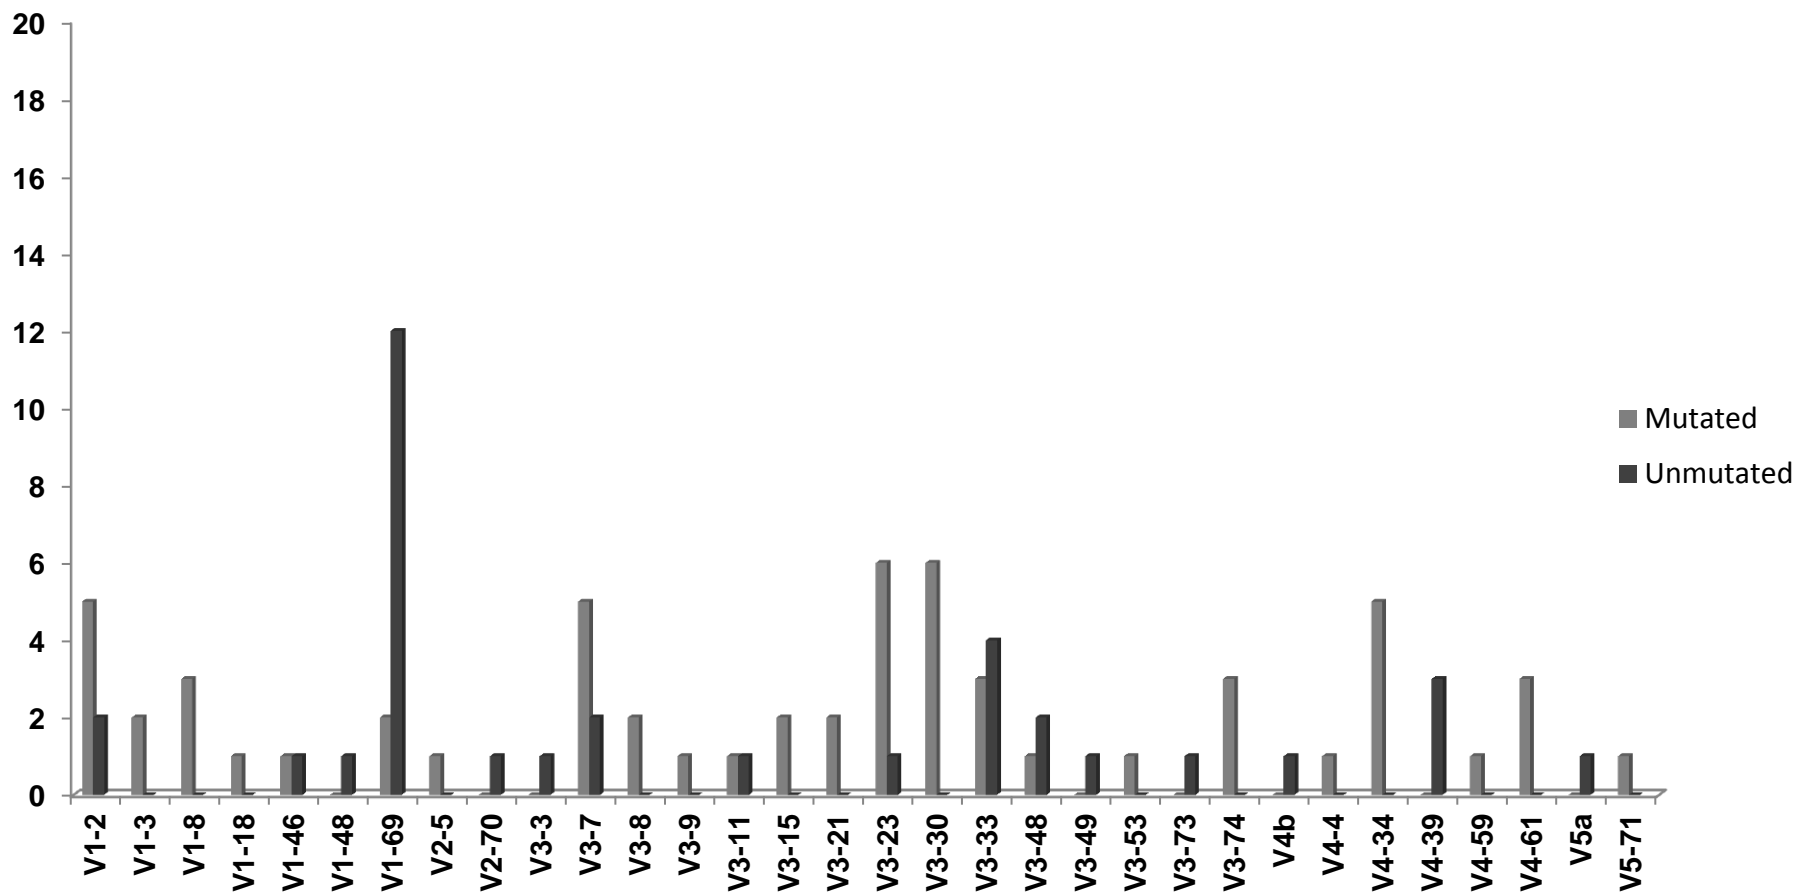**B.**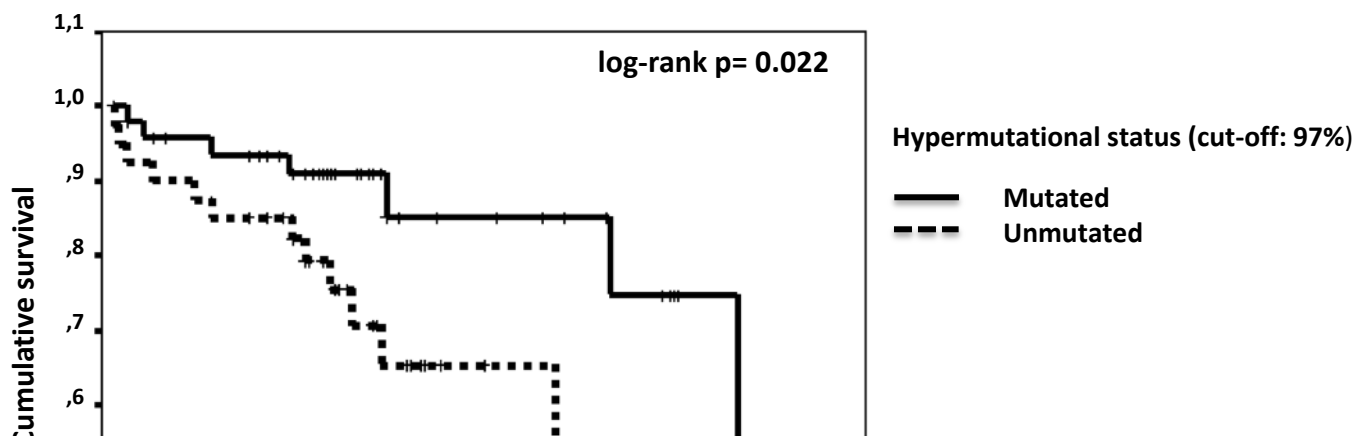

**Supplementary Table 1. Immunophenotyping of 19 healthy individuals analyzed in this study**

|                                                                          |                      |
|--------------------------------------------------------------------------|----------------------|
| WBC (x 10 <sup>9</sup> /L) (median, IQR)                                 | 6.60 (5.38, 8.23)    |
| Neutrophils (x 10 <sup>9</sup> /L) (median, IQR)                         | 3.70 (2.87, 4.99)    |
| Monocytes (x 10 <sup>9</sup> /L) (median, IQR)                           | 0.39 (0.28, 0.49)    |
| Lymphocytes (x 10 <sup>9</sup> /L) (median, IQR)                         | 2.34 (1.88, 2.92)    |
| T cells (%) (median - IQR)                                               | 68.30 (61.22, 75.97) |
| T cells (x 10 <sup>9</sup> /L) (median - IQR)                            | 1.53 (1.25, 1.96)    |
| T4 cells (%) (median - IQR)                                              | 65.85 (58.45, 71.45) |
| T4 cells (x 10 <sup>9</sup> /L) (median - IQR)                           | 1.00 (0.81, 1.26)    |
| T8 cells (%) (median - IQR)                                              | 31.30 (25.67, 37.47) |
| T8 cells (x 10 <sup>9</sup> /L) (median - IQR)                           | 0.48 (0.35, 0.64)    |
| Ratio T4/T8 (median, IQR)                                                | 1.20 (0.91, 2.00)    |
| B cells (%) (median, IQR)                                                | 9.60 (7.30, 12.37)   |
| B cells (x 10 <sup>9</sup> /L) (median, IQR)                             | 0.22 (0.16, 0.32)    |
| IgD <sup>+</sup> /CD27 <sup>-</sup> (%) (median, IQR)                    | 61.85 (50.90-76.45)  |
| IgD <sup>+</sup> /CD27 <sup>-</sup> (x 10 <sup>9</sup> /L) (median, IQR) | 0.12 (0.09-0.19)     |
| IgD <sup>+</sup> /CD27 <sup>+</sup> (%) (median, IQR)                    | 9.10 (4.82-14.12)    |
| IgD <sup>+</sup> /CD27 <sup>+</sup> (x 10 <sup>9</sup> /L) (median, IQR) | 0.02 (0.01-0.04)     |
| IgD <sup>-</sup> /CD27 <sup>+</sup> (%) (median, IQR)                    | 20.20 (12.60-30.48)  |
| IgD <sup>-</sup> /CD27 <sup>+</sup> (x 10 <sup>9</sup> /L) (median, IQR) | 0.04 (0.02-0.07)     |

Abbreviations: IQR, interquartile range; WBC, white blood cell count

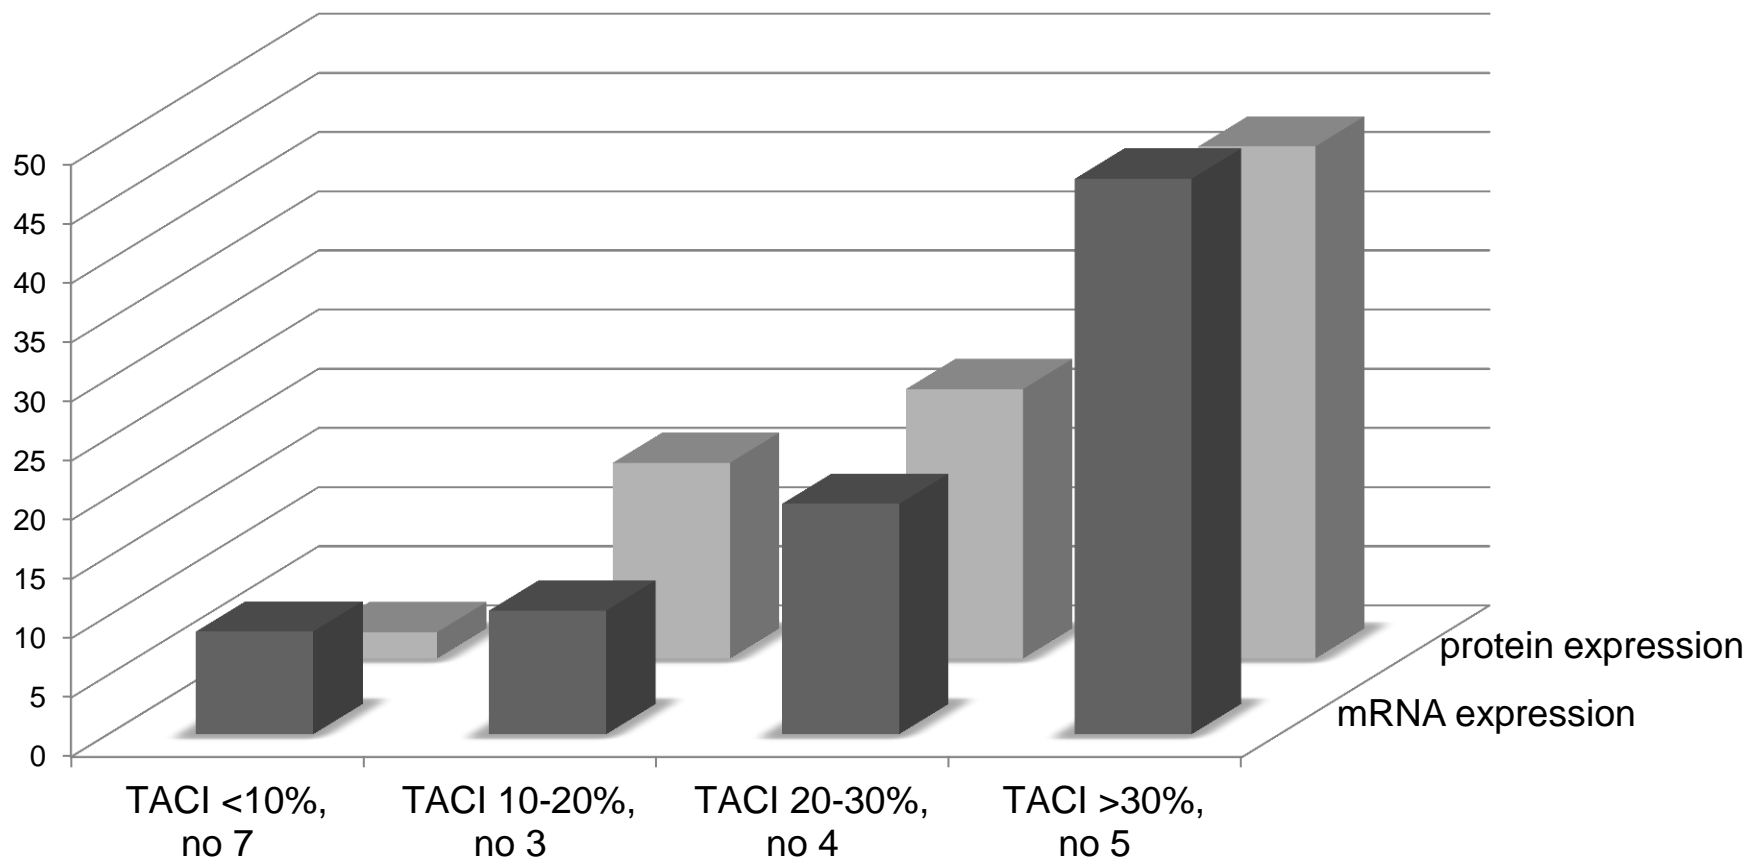

Supplement: 478753.f1.pdf [file 478753.f1.pdf]
